# Supplementary material
Source: HighWire-hosted journal article supplement (https://www.jneurosci.org/highwire/filestream/599310/field_highwire_adjunct_files/5/Supplemental_Table_2.pdf)
Supplement: Supplemental_Table_2.pdf [file Supplemental_Table_2.pdf]

**Supplemental Table 2. Regions of structural cortical network (sparsity = 13%) in the normal subjects and their statistical properties**

| Regions | Class       | $b_i$ | $k_i$ |
|---------|-------------|-------|-------|
| LOFG.R  | Paralimbic  | 3.26  | 11    |
| LOFG.L  | Paralimbic  | 2.90  | 11    |
| LING.R  | Association | 2.39  | 10    |
| ANG.R   | Association | 2.19  | 12    |
| ANG.L   | Association | 2.12  | 12    |
| STG.L   | Association | 1.98  | 13    |
| STG.R   | Association | 1.96  | 12    |
| MTG.L   | Association | 1.92  | 11    |
| MFG.L   | Association | 1.82  | 9     |
| PrCG.L  | Primary     | 1.66  | 9     |
| SMG.L   | Association | 1.55  | 11    |
| PHG.L   | Paralimbic  | 1.36  | 9     |
| SMG.R   | Association | 1.36  | 7     |
| SPL.L   | Association | 1.32  | 11    |
| IFG.R   | Association | 1.25  | 6     |
| MOG.L   | Association | 1.20  | 5     |
| PCU.R   | Association | 1.18  | 7     |
| ITG.L   | Association | 1.15  | 8     |
| MTG.R   | Association | 1.12  | 11    |
| MOTG.L  | Association | 1.08  | 7     |
| MOFG.L  | Paralimbic  | 1.07  | 9     |
| CING.L  | Paralimbic  | 1.06  | 6     |
| INS.R   | Paralimbic  | 1.02  | 6     |
| INS.L   | Paralimbic  | 0.97  | 5     |
| SOG.L   | Association | 0.95  | 11    |
| LOTG.R  | Association | 0.93  | 6     |
| SFG.R   | Association | 0.88  | 7     |
| SOG.R   | Association | 0.87  | 9     |
| ITG.R   | Association | 0.86  | 7     |

|        |             |      |   |
|--------|-------------|------|---|
| PoCG.R | Primary     | 0.78 | 6 |
| PrCG.R | Primary     | 0.75 | 7 |
| UNC.L  | Paralimbic  | 0.73 | 8 |
| MOTG.R | Association | 0.73 | 5 |
| OP.L   | Primary     | 0.70 | 8 |
| SPL.R  | Association | 0.63 | 7 |
| PoCG.L | Primary     | 0.62 | 7 |
| SFG.L  | Association | 0.57 | 5 |
| IFG.L  | Association | 0.53 | 5 |
| MdFG.L | Association | 0.46 | 4 |
| PHG.R  | Paralimbic  | 0.45 | 5 |
| LING.L | Association | 0.43 | 4 |
| MOFG.R | Paralimbic  | 0.42 | 4 |
| MdFG.R | Association | 0.41 | 4 |
| CUN.L  | Association | 0.36 | 6 |
| MFG.R  | Association | 0.36 | 4 |
| IOG.L  | Association | 0.31 | 4 |
| OP.R   | Primary     | 0.30 | 5 |
| LOTG.L | Association | 0.23 | 3 |
| UNC.R  | Paralimbic  | 0.20 | 4 |
| MOG.R  | Association | 0.17 | 5 |
| PCU.L  | Association | 0.16 | 3 |
| IOG.R  | Association | 0.15 | 4 |
| CUN.R  | Association | 0.13 | 3 |
| CING.R | Paralimbic  | 0.03 | 2 |

---

All of regions in the structural cortical network in the normal subjects group, were listed in a descending order of the normalized betweenness,  $b_i$ . The regions were classified as Primary, Associations and Paralimbic as described by Mesulam (1998).  $k_i$  denotes the degree of region  $i$ . For the abbreviation of regions, see Supplemental Table 1.
